# Supplementary material for: Modeling of Experimental Data Supports HIV Reactivation from Latency after Treatment Interruption on Average Once Every 5–8 Days
Source: PubMed Central journal article supplement (PMC4999223; doi:10.1371/journal.ppat.1005740), 2016-08-25
Supplement: ppat.1005740.s002.pdf [file ppat.1005740.s002.pdf]

**Data on time to detection across cohorts.**

| <b>Cohort 1</b>       |          |          |          |          |          |          |          |          |          |          |          |          |          |          |          |    |    |    |
|-----------------------|----------|----------|----------|----------|----------|----------|----------|----------|----------|----------|----------|----------|----------|----------|----------|----|----|----|
| Patient ID            | 1        | 2        | 3        | 4        | 5        | 6        | 7        | 8        | 9        |          |          |          |          |          |          |    |    |    |
| Days to detection     | 10       | 14       | 45       | 14       | 24       | 7        | 17       | 10       | 14       |          |          |          |          |          |          |    |    |    |
| <b>Cohort 2</b>       |          |          |          |          |          |          |          |          |          |          |          |          |          |          |          |    |    |    |
| Patient ID            | 1        | 2        | 3        | 4        | 5        | 6        | 7        | 8        | 9        | 10       | 11       | 12       | 13       | 14       | 15       | 16 | 17 | 18 |
| Days to detection     | 21       | 21       | 7        | 7        | 14       | 14       | 14       | 14       | 7        | 28       | 7        | 7        | 14       | 7        | 14       | 14 | 14 | 7  |
| Patient ID            | 19       | 20       | 21       | 22       | 23       | 24       | 25       | 26       | 27       | 28       | 29       | 30       | 31       | 32       | 33       | 34 | 35 | 36 |
| Days to detection     | 21       | 7        | 14       | 21       | 14       | 7        | 7        | 14       | 14       | 7        | 21       | 7        | 14       | 14       | 14       | 14 | 14 | 7  |
| Patient ID            | 37       | 38       | 39       | 40       | 41       | 42       | 43       | 44       | 45       | 46       | 47       | 48       | 49       | 50       | 51       | 52 | 53 | 54 |
| Days to detection     | 21       | 7        | 14       | 21       | 14       | 7        | 14       | 14       | 14       | 28       | 28       | 14       | 14       | 14       | 14       | 28 | 14 | 14 |
| Patient ID            | 55       | 56       | 57       | 58       | 59       |          |          |          |          |          |          |          |          |          |          |    |    |    |
| Days to detection     | 14       | 21       | 56       | 14       | 28       |          |          |          |          |          |          |          |          |          |          |    |    |    |
| <b>Cohort 3</b>       |          |          |          |          |          |          |          |          |          |          |          |          |          |          |          |    |    |    |
| Patient ID            | 1        | 2        | 3        | 4        | 5        | 6        | 7        | 8        | 9        | 10       | 11       | 12       | 13       | 14       | 15       | 16 | 17 | 18 |
| Days to detection     | 5.4      | 3.8      | 8.9      | 11       | 47       | 8.4      | 9        | 9.8      | 5.6      | 12       | 9.8      | 11       | 8        | 15       | 13       | 12 | 7  | 7  |
| <b>Cohort 4</b>       |          |          |          |          |          |          |          |          |          |          |          |          |          |          |          |    |    |    |
| Patient ID            | 102      | 104      | 105      | 109      | 111      | 112      | 116      | 118      | 120      | 121      | 125      | 127      | 128      | 130      |          |    |    |    |
| <i>Interruption 1</i> |          |          |          |          |          |          |          |          |          |          |          |          |          |          |          |    |    |    |
| Days to event         | 4        | 8        | 8        | 8        | 8        | 4        | 4        | 4        | 14       | 8        | 4        | 14       | 8        | 14       |          |    |    |    |
| Event                 | positive | positive | positive | positive | positive | positive | positive | positive | positive | positive | positive | positive | positive | positive | censored |    |    |    |
| <i>Interruption 2</i> |          |          |          |          |          |          |          |          |          |          |          |          |          |          |          |    |    |    |
| Days to event         | 8        |          | 14       | 4        | 8        | 14       | 8        | 14       | 14       | 4        |          | 8        | 8        | 14       |          |    |    |    |
| Event                 | positive |          | censored | positive | positive | positive | positive | positive | positive | censored |          | positive | positive | censored |          |    |    |    |
| <i>Interruption 3</i> |          |          |          |          |          |          |          |          |          |          |          |          |          |          |          |    |    |    |
| Days to event         | 8        |          | 14       | 4        | 4        | 4        |          |          | 14       | 4        | 14       | 4        | 8        | 14       |          |    |    |    |
| Event                 | positive |          | censored | positive | positive | censored |          |          | censored | censored | positive | positive | positive | censored |          |    |    |    |
| <i>Interruption 4</i> |          |          |          |          |          |          |          |          |          |          |          |          |          |          |          |    |    |    |
| Days to event         | 8        |          | 14       |          | 8        | 8        | 8        |          | 14       | 8        | 14       |          | 4        | 14       |          |    |    |    |
| Event                 | positive |          | censored |          | positive | positive | positive |          | positive | censored | positive |          | positive | censored |          |    |    |    |
| <i>Interruption 5</i> |          |          |          |          |          |          |          |          |          |          |          |          |          |          |          |    |    |    |
| Days to event         | 8        |          | 14       | 8        | 14       | 8        | 4        | 14       | 14       | 8        | 4        |          |          | 14       |          |    |    |    |
| Event                 | positive |          | censored | positive | positive | positive | positive | positive | censored | positive | censored |          |          | censored |          |    |    |    |
